# Supplementary material for: Syntheses, structures, and photoluminescent properties of a series of zinc(ii)–3-amino-1,2,4-triazolate coordination polymers constructed by varying carboxylate anions
Source: Royal Society of Chemistry journal article supplement (doi:10.1039/c3ce00049d), 2013-01-01
Supplement: c3ce00049d.pdf [file c3ce00049d.pdf]

## **Supplementary Materials**

# **Syntheses, Structures, and Photoluminescent Properties of a Series of Zinc(II)-3-amino-1,2,4-triazolate Coordination Polymers Constructed by Varying Carboxylate Anions**

JinYing Gao,<sup>a</sup> Ning Wang,<sup>b</sup> XiaHua Xiong,<sup>c</sup> ChuJun Chen,<sup>a</sup>

WeiPing Xie,<sup>a</sup> XingRui Ran,<sup>a</sup> Yi Long,<sup>b</sup> ShanTang Yue,<sup>\*a</sup> YingLiang Liu,<sup>d</sup>

*a School of Chemistry and Environment, South China Normal University, Guangzhou  
510006, PR China*

*b School of Materials Science and Engineering, Nanyang Technological University, 50  
Nanyang Avenue, 639798 (Singapore)*

*c College of Material Science of Engineering, South China University of Technology,  
Guangzhou, 510640, P. R. China*

*d College of Science, South China Agricultural University, Guangzhou 510642, P. R.  
China*

*\* To whom correspondence should be addressed. E-mail: yuesht@scnu.edu.cn; Tel./fax:  
+86 20 39310187.*

**Table S1** Selected bond distances (Å) and angles (°) for complexes **1-5**.

| <b>Compound 1</b>                                                                                                                                                      |            |                     |            |                     |            |
|------------------------------------------------------------------------------------------------------------------------------------------------------------------------|------------|---------------------|------------|---------------------|------------|
| Zn(1)-N(2)#1                                                                                                                                                           | 1.996(7)   | N(1)-C(2)           | 1.363(12)  | N(2)-Zn(1)#4        | 1.996(7)   |
| Zn(1)-O(1)                                                                                                                                                             | 2.020(10)  | N(4)-C(2)           | 1.344(13)  | N(3)-Zn(1)#3        | 2.023(7)   |
| Zn(1)-N(3)#2                                                                                                                                                           | 2.023(7)   | C(2)-N(3)           | 1.324(12)  | N(3)-N(2)           | 1.392(10)  |
| Zn(1)-N(1)                                                                                                                                                             | 2.032(7)   | C(4)-C(5)           | 1.33(2)    | C(1)-N(2)           | 1.315(11)  |
| O(1)-C(3)                                                                                                                                                              | 1.224(15)  | C(4)-C(9)           | 1.357(19)  | N(1)-C(1)           | 1.338(12)  |
| N(2)#1-Zn(1)-O(1)                                                                                                                                                      | 131.2(4)   | N(2)#1-Zn(1)-N(3)#2 | 106.4(3)   | O(1)-Zn(1)-N(3)#2   | 94.2(4)    |
| N(2)#1-Zn(1)-N(1)                                                                                                                                                      | 109.3(3)   | O(1)-Zn(1)-N(1)     | 105.6(4)   | N(3)#2-Zn(1)-N(1)   | 107.2(3)   |
| C(3)-O(1)-Zn(1)                                                                                                                                                        | 104.3(10)  | C(1)-N(1)-C(2)      | 103.6(8)   | C(1)-N(1)-Zn(1)     | 127.5(6)   |
| N(3)-C(2)-N(4)                                                                                                                                                         | 123.9(9)   | C(5)-C(4)-C(9)      | 119.1(15)  | O(1)-C(3)-O(2)      | 120.3(15)  |
| Symmetry codes: #1 $x+1/2, y+1/2, -z+1$ #2 $-x+1/2, y-1/2, z$ #3 $-x+1/2, y+1/2, z$ #4 $x-1/2, y+1/2, -z+1$                                                            |            |                     |            |                     |            |
| <b>Compound 2</b>                                                                                                                                                      |            |                     |            |                     |            |
| Zn(1)-O(1)                                                                                                                                                             | 1.947(5)   | Zn(1)-N(2)#1        | 1.984(5)   | Zn(1)-N(4)#2        | 2.031(5)   |
| Zn(1)-N(1)                                                                                                                                                             | 2.031(5)   | O(2)-C(3)           | 1.226(10)  | O(1)-C(3)           | 1.226(10)  |
| C(4)-C(5)                                                                                                                                                              | 1.366(10)  | N(2)-C(2)           | 1.332(8)   | N(2)-N(1)           | 1.390(7)   |
| N(2)-Zn(1)#1                                                                                                                                                           | 1.984(5)   | C(2)-N(4)           | 1.351(7)   | C(2)-N(3)           | 1.355(8)   |
| N(4)-Zn(1)#4                                                                                                                                                           | 2.031(5)   | C(1)-N(4)           | 1.337(7)   | C(1)-N(1)           | 1.308(8)   |
| O(1)-Zn(1)-N(2)#1                                                                                                                                                      | 132.2(2)   | O(1)-Zn(1)-N(4)#2   | 108.1(2)   | N(2)#1-Zn(1)-N(4)#2 | 108.4(2)   |
| O(1)-Zn(1)-N(1)                                                                                                                                                        | 96.8(2)    | N(2)#1-Zn(1)-N(1)   | 105.80(19) | N(4)#2-Zn(1)-N(1)   | 100.5(2)   |
| C(3)-O(1)-Zn(1)                                                                                                                                                        | 108.9(5)   | C(5)-C(4)-C(6)#3    | 118.8(7)   | O(2)-C(3)-O(1)      | 122.2(7)   |
| C(2)-N(2)-Zn(1)#1                                                                                                                                                      | 132.2(4)   | C(2)-N(2)-N(1)      | 105.5(5)   | N(1)-N(2)-Zn(1)#1   | 118.6(4)   |
| Symmetry codes: #1 $-x+2, -y, -z+1$ #2 $-y+1, x-1/2, -z+1$ #3 $-x+3/2, y, -z+3/2$ #4 $y+1/2, -x+1, -z+1$                                                               |            |                     |            |                     |            |
| <b>Compound 3</b>                                                                                                                                                      |            |                     |            |                     |            |
| C(1)-N(1)                                                                                                                                                              | 1.323(8)   | C(1)-N(2)           | 1.357(9)   | C(3)-N(5)           | 1.346(8)   |
| C(3)-N(8)                                                                                                                                                              | 1.351(8)   | C(3)-N(7)           | 1.374(8)   | C(4)-N(6)           | 1.324(8)   |
| C(4)-N(7)                                                                                                                                                              | 1.368(8)   | C(5)-O(2)           | 1.232(9)   | C(5)-O(1)           | 1.298(8)   |
| Zn(2)-O(4)#5                                                                                                                                                           | 2.004(5)   | Zn(2)-N(2)#6        | 2.048(5)   | C(12)-O(3)          | 1.220(9)   |
| C(12)-O(4)                                                                                                                                                             | 1.301(9)   | C(2)-N(4)           | 1.301(9)   | C(2)-N(3)           | 1.362(9)   |
| N(5)-N(6)                                                                                                                                                              | 1.412(8)   | N(5)-Zn(2)          | 2.001(5)   | N(4)-N(1)           | 1.401(7)   |
| N(1)-Zn(1)                                                                                                                                                             | 1.977(5)   | N(2)-Zn(2)#1        | 2.048(5)   | N(7)-Zn(1)#2        | 2.029(5)   |
| O(1)-Zn(1)                                                                                                                                                             | 1.960(5)   | O(4)-Zn(2)#3        | 2.004(5)   | Zn(1)-N(7)#4        | 2.029(5)   |
| O(1)-Zn(1)-N(1)                                                                                                                                                        | 121.2(2)   | O(1)-Zn(1)-N(7)#4   | 98.9(2)    | N(1)-Zn(1)-N(7)#4   | 110.0(2)   |
| O(1)-Zn(1)-N(6)                                                                                                                                                        | 102.9(2)   | N(1)-Zn(1)-N(6)     | 110.5(2)   | N(7)#4-Zn(1)-N(6)   | 113.0(2)   |
| N(5)-Zn(2)-O(4)#5                                                                                                                                                      | 124.1(2)   | N(5)-Zn(2)-N(4)     | 109.8(2)   | O(4)#5-Zn(2)-N(4)   | 95.2(2)    |
| N(5)-Zn(2)-N(2)#6                                                                                                                                                      | 116.2(2)   | O(4)#5-Zn(2)-N(2)#6 | 99.9(2)    | N(4)-Zn(2)-N(2)#6   | 109.3(2)   |
| C(1)-N(1)-Zn(1)                                                                                                                                                        | 131.1(5)   | N(4)-N(1)-Zn(1)     | 123.4(4)   | C(5)-O(1)-Zn(1)     | 111.3(5)   |
| N(1)-N(4)-Zn(2)                                                                                                                                                        | 124.3(4)   | C(3)-N(5)-Zn(2)     | 130.0(5)   | O(3)-C(12)-O(4)     | 122.0(7)   |
| Symmetry codes: #1 $-x+2, y-1/2, -z+1/2$ #2 $-x+1, y+1/2, -z+1/2$ #3 $x-1, -y+1/2, z-1/2$<br>#4 $-x+1, y-1/2, -z+1/2$ #5 $x+1, -y+1/2, z+1/2$ #6 $-x+2, y+1/2, -z+1/2$ |            |                     |            |                     |            |
| <b>Compound 4</b>                                                                                                                                                      |            |                     |            |                     |            |
| Zn(3)-O(1)                                                                                                                                                             | 1.984(3)   | Zn(3)-N(2)          | 1.998(4)   | Zn(3)-N(5)          | 2.000(4)   |
| Zn(3)-O(7)                                                                                                                                                             | 2.075(4)   | Zn(2)-N(6)          | 1.991(4)   | Zn(2)-N(3)          | 1.999(4)   |
| Zn(2)-O(11)#1                                                                                                                                                          | 2.002(3)   | Zn(2)-O(2W)         | 2.005(2)   | Zn(1)-O(5)#2        | 1.918(3)   |
| Zn(1)-O(8)#3                                                                                                                                                           | 1.940(3)   | Zn(1)-N(1)          | 1.979(3)   | Zn(1)-O(1W)         | 2.0023(19) |
| Zn(4)-O(4)#4                                                                                                                                                           | 1.910(3)   | Zn(4)-O(9)#5        | 1.920(3)   | Zn(4)-N(7)          | 1.977(4)   |
| Zn(4)-O(3W)                                                                                                                                                            | 2.0090(19) | N(3)-C(2)           | 1.332(5)   | N(3)-N(2)           | 1.396(5)   |
| C(5)-O(2)                                                                                                                                                              | 1.254(5)   | C(5)-O(1)           | 1.264(5)   | C(5)-C(6)           | 1.490(6)   |

|                                                                                                                                                  |            |                     |            |                     |            |
|--------------------------------------------------------------------------------------------------------------------------------------------------|------------|---------------------|------------|---------------------|------------|
| N(7)-C(3)                                                                                                                                        | 1.343(6)   | N(7)-C(4)           | 1.352(5)   | N(6)-C(3)           | 1.312(6)   |
| N(6)-N(5)                                                                                                                                        | 1.390(5)   | O(11)-Zn(2)#1       | 2.002(3)   | O(8)-Zn(1)#3        | 1.940(3)   |
| O(5)-Zn(1)#6                                                                                                                                     | 1.918(3)   | O(4)-Zn(4)#7        | 1.910(3)   | O(9)-Zn(4)#5        | 1.920(3)   |
| O(1)-Zn(3)-N(2)                                                                                                                                  | 137.81(15) | O(1)-Zn(3)-N(5)     | 102.46(14) | N(2)-Zn(3)-N(5)     | 107.64(15) |
| O(1)-Zn(3)-O(7)                                                                                                                                  | 95.99(14)  | N(2)-Zn(3)-O(7)     | 107.43(15) | N(5)-Zn(3)-O(7)     | 99.14(14)  |
| N(6)-Zn(2)-N(3)                                                                                                                                  | 107.47(16) | N(6)-Zn(2)-O(11)#1  | 136.37(16) | N(3)-Zn(2)-O(11)#1  | 101.52(14) |
| N(6)-Zn(2)-O(2W)                                                                                                                                 | 106.26(13) | N(3)-Zn(2)-O(2W)    | 99.50(13)  | O(11)#1-Zn(2)-O(2W) | 100.14(13) |
| O(5)#2-Zn(1)-O(8)#3                                                                                                                              | 95.11(14)  | O(5)#2-Zn(1)-N(1)   | 127.57(15) | O(8)#3-Zn(1)-N(1)   | 123.13(14) |
| O(5)#2-Zn(1)-O(1W)                                                                                                                               | 104.53(12) | O(8)#3-Zn(1)-O(1W)  | 103.74(12) | N(1)-Zn(1)-O(1W)    | 99.72(12)  |
| O(4)#4-Zn(4)-O(9)#5                                                                                                                              | 94.12(15)  | O(4)#4-Zn(4)-N(7)   | 128.09(16) | O(9)#5-Zn(4)-N(7)   | 124.69(16) |
| Symmetry codes: #1 -x,-y,-z+1 #2 x-1/2,y+1/2,z #3 -x+1/2,-y+1/2,-z+1 #4 x-1/2,y-1/2,z<br>#5 -x+1/2,-y-1/2,-z+1 #6 x+1/2,y-1/2,z #7 x+1/2,y+1/2,z |            |                     |            |                     |            |
| <b>Compound 5</b>                                                                                                                                |            |                     |            |                     |            |
| Zn(1)-O(4)#1                                                                                                                                     | 1.966(7)   | C(5)-C(6)#5         | 1.379(12)  | Zn(1)-N(3)#3        | 1.973(7)   |
| Zn(1)-N(3)                                                                                                                                       | 1.973(7)   | Zn(2)-N(1)          | 2.000(7)   | Zn(2)-N(2)#4        | 2.031(6)   |
| Zn(2)-O(3)                                                                                                                                       | 2.148(8)   | Zn(2)-O(1)          | 2.175(7)   | Zn(2)-O(2)          | 2.228(7)   |
| Zn(2)-O(1W)                                                                                                                                      | 2.276(6)   | C(3)-O(2)           | 1.250(12)  | C(3)-O(1)           | 1.253(12)  |
| C(3)-C(4)                                                                                                                                        | 1.498(13)  | C(6)-C(7)#6         | 1.507(13)  | N(1)-C(2)           | 1.336(11)  |
| C(7)-C(6)#6                                                                                                                                      | 1.507(13)  | N(2)-Zn(2)#4        | 2.031(6)   | O(4)-Zn(1)#2        | 1.966(7)   |
| O(4)#1-Zn(1)-O(4)#2                                                                                                                              | 103.4(4)   | O(4)#1-Zn(1)-N(3)#3 | 117.2(3)   | O(4)#2-Zn(1)-N(3)#3 | 104.0(3)   |
| O(4)#1-Zn(1)-N(3)                                                                                                                                | 104.0(3)   | O(4)#2-Zn(1)-N(3)   | 117.2(3)   | N(3)#3-Zn(1)-N(3)   | 111.3(4)   |
| N(1)-Zn(2)-N(2)#4                                                                                                                                | 107.1(3)   | N(1)-Zn(2)-O(3)     | 103.5(3)   | N(2)#4-Zn(2)-O(3)   | 93.2(3)    |
| N(1)-Zn(2)-O(1)                                                                                                                                  | 99.3(3)    | N(2)#4-Zn(2)-O(1)   | 152.0(3)   | O(3)-Zn(2)-O(1)     | 89.7(3)    |
| N(1)-Zn(2)-O(2)                                                                                                                                  | 157.3(3)   | N(2)#4-Zn(2)-O(2)   | 93.3(2)    | O(3)-Zn(2)-O(2)     | 84.9(3)    |
| O(1)-Zn(2)-O(2)                                                                                                                                  | 91.8(2)    | O(2)-C(3)-O(1)      | 120.7(9)   | N(2)-C(1)-N(3)      | 112.6(8)   |
| Symmetry codes: #1 x,-y,z-1/2 #2 -x+2,-y,-z+1 #3 -x+2,y,-z+1/2<br>#4 -x+3/2,-y+1/2,-z+1 #5 -x,-y,-z+1 #6 -x+1,-y,-z+1                            |            |                     |            |                     |            |

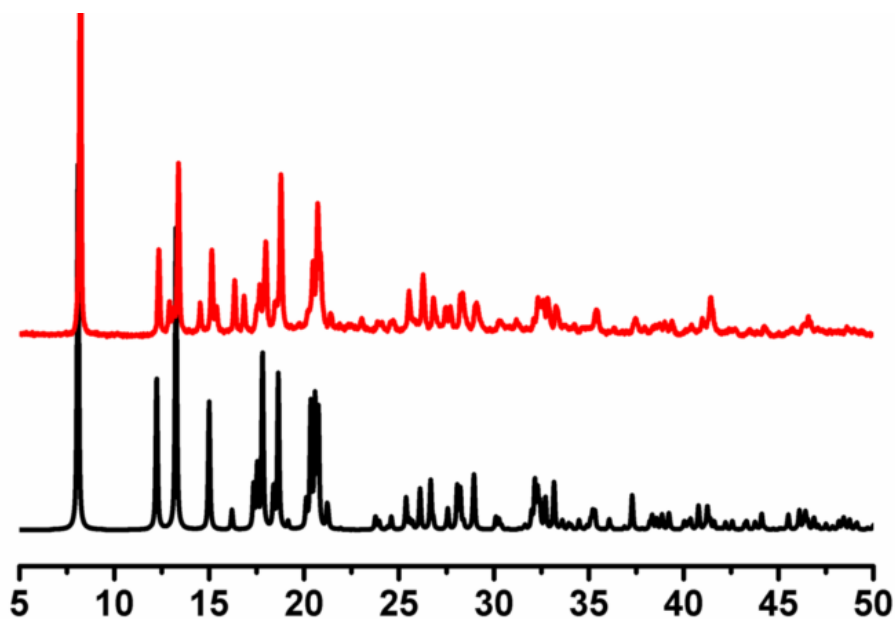

Fig. S1. Powder X-ray diffraction data for compounds **1**. black: simulated, red: measured.

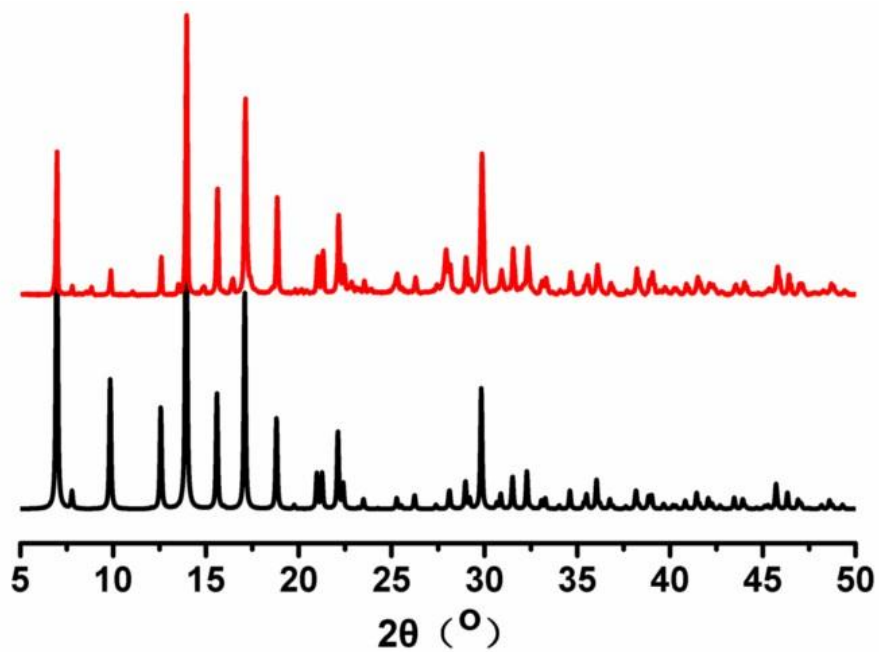

Fig. S2. Powder X-ray diffraction data for compounds **2**. black: simulated, red: measured.

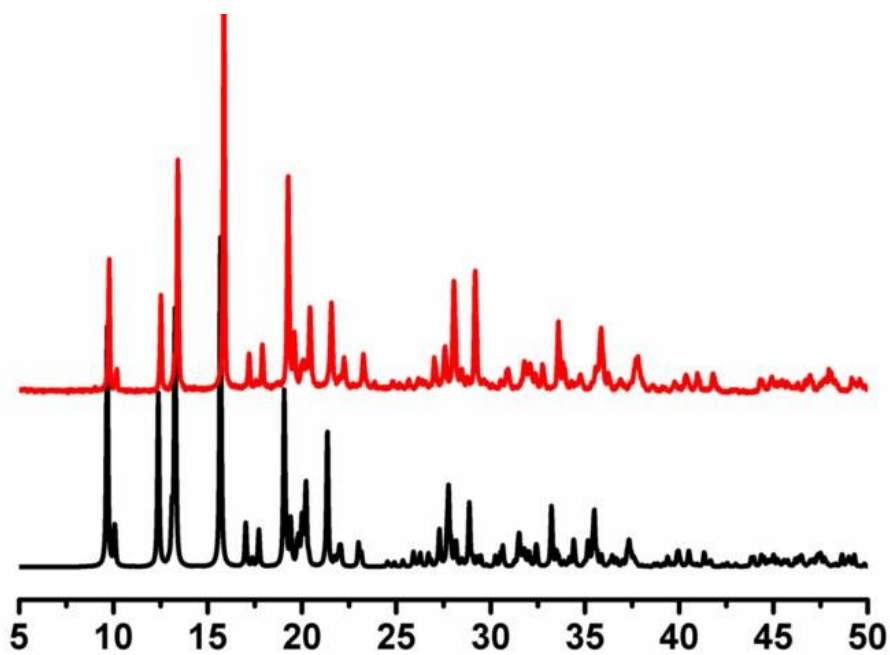

Fig. S3. Powder X-ray diffraction data for compounds **3**. black: simulated, red: measured.

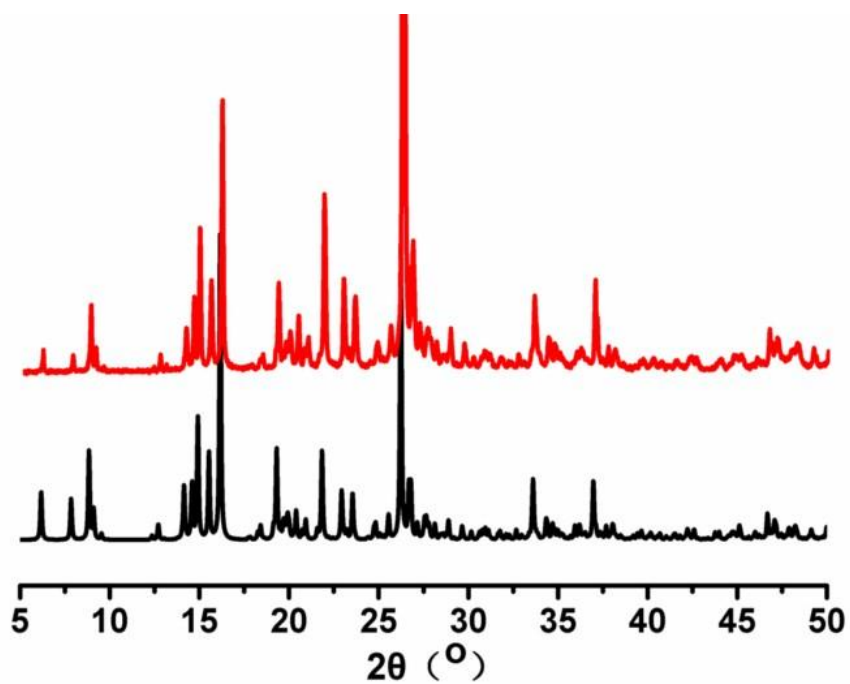

Fig. S4. Powder X-ray diffraction data for compounds **4**. black: simulated, red: measured.

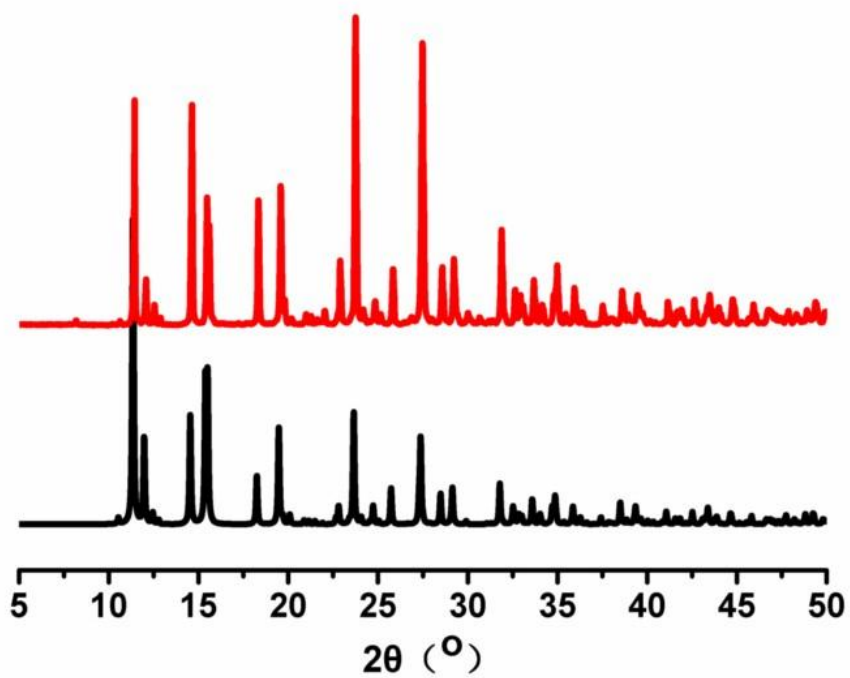

Fig. S5. Powder X-ray diffraction data for compounds **5**. black: simulated, red: measured.

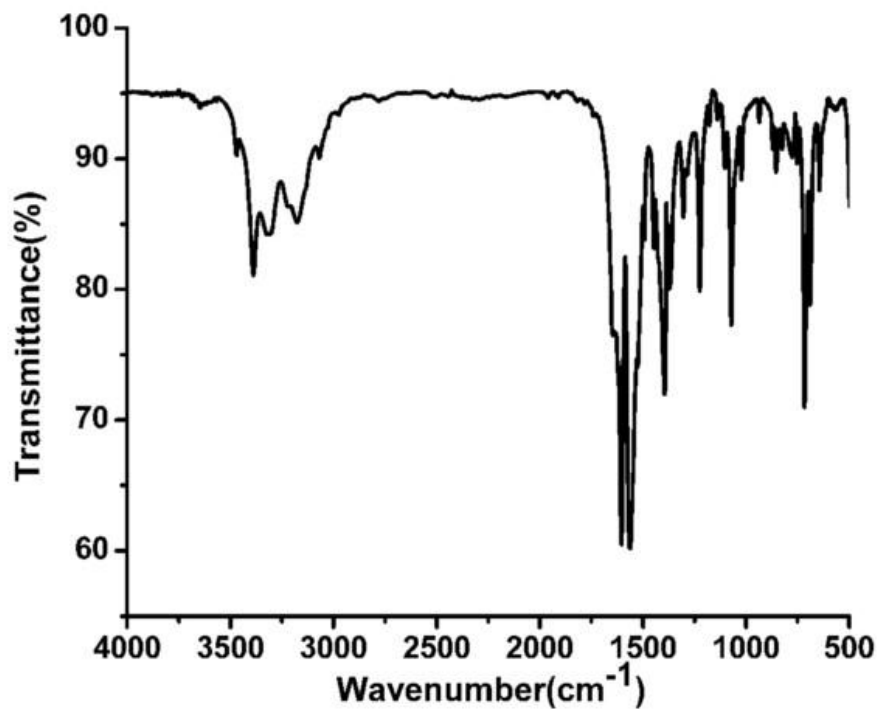

Fig. S6. IR spectra of compound 1.

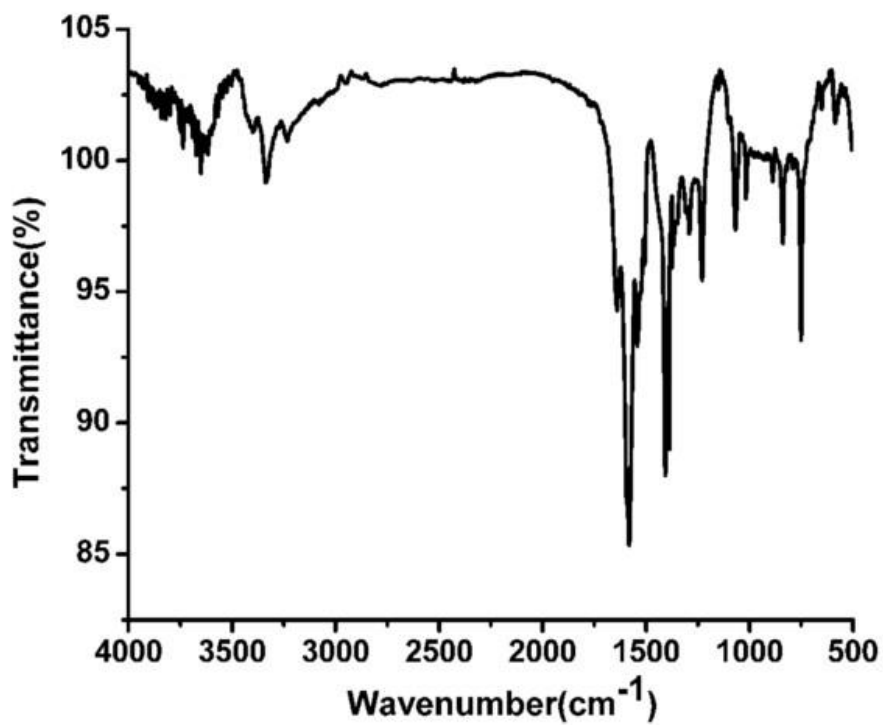

Fig. S7. IR spectra of compound 2.

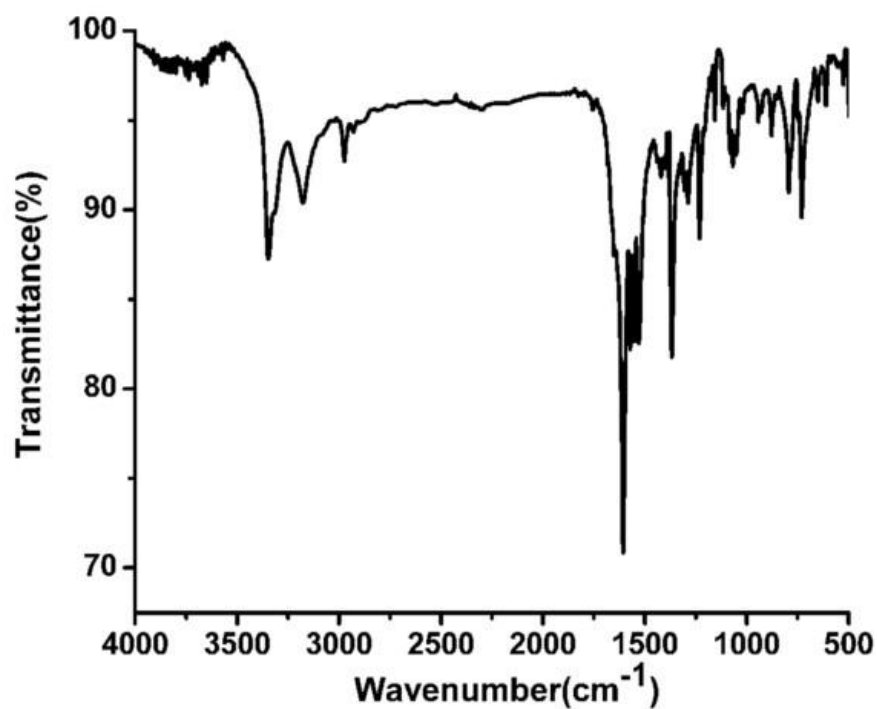

Fig. S8. IR spectra of compound 3.

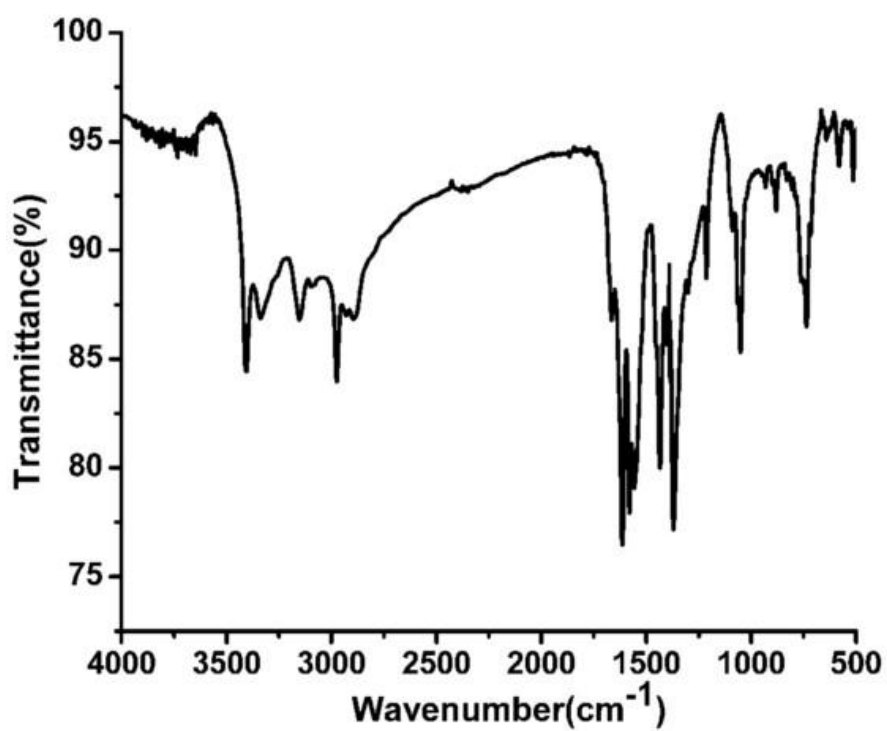

Fig. S9. IR spectra of compound 4.

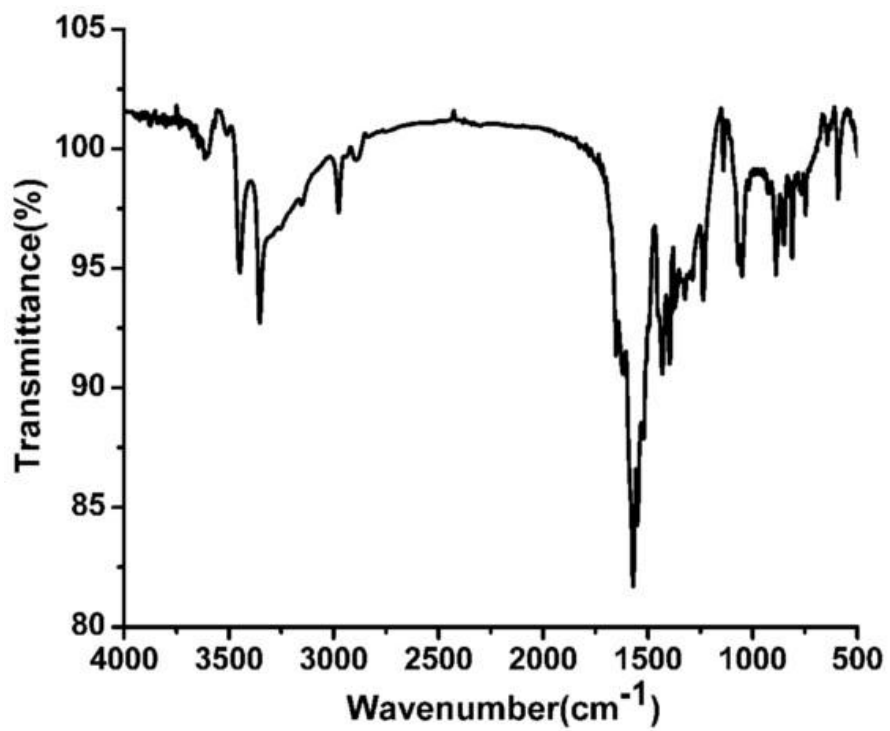

Fig. S10. IR spectra of compound 5.
